# Supplementary material for: Relationship between clinical and patient-reported outcomes in a phase 3 trial of tofacitinib or MTX in MTX-naïve patients with rheumatoid arthritis
Source: PubMed Central journal article supplement — RMD Open. 2016 Apr 26;2(1):e000232. doi: 10.1136/rmdopen-2015-000232 (PMC4860866; doi:10.1136/rmdopen-2015-000232), 2016-04-26
Supplement: rmdopen-2015-000232supp.pdf [file rmdopen-2015-000232supp.pdf]

## Supplementary material

### Study Investigators

*United States:* Dr. Cummins Lue; Dr. William Martin Schnitz; Dr. Herbert Stuart Block Baraf; Dr. Marcy Behar Bolster; Dr. Alan Jan Kivitz; Dr. Steven Charles Kimmel; Dr. Edward Joel Fudman; Dr. Emmanuel Adolphus Quaidoo; Dr. Melvin Albert Churchill Jr; Dr. Charles Allen Birbara; Dr. Selden Longley III; Dr. William Stohl; Dr. Mark William Niemer; Dr. Dayton Dennis Payne Jr; Dr. Jeffrey Louis Kaine; Dr. Shelly Pearl Kafka; Dr. Roy Mitchell Fleischmann; Dr. Christina Marie Charles-Schoeman; Dr. Arthur Francis Kavanaugh; Dr. Joel Marc Kremer; Dr. Jeffrey Sanders Ritter; Dr. Michael Thomas Stack; Dr. Melanie Creech Barron; Dr. Jacob Asher Aelion; Dr. Robert Michael Griffin Jr; Dr. Stanford Lee-Yu Peng; Dr. Bridget Tyrell Walsh; Dr. Joel Charles Silverfield.

*Latin America:* Dr. Mariano Ricardo Ghirlanda, Argentina; Dr. Guillermo A. Tate, Argentina; Dr. Gustavo Citera, Argentina; Dr. Antonio Carlos Ximenes, Brazil; Dr. Sebastiao Cezar Radominski, Brazil; Dr. Mauro W. Keiserman, Brazil; Dr. Cristiano Augusto de Freitas Zerbini, Brazil; Dr. Renato Jimenez Calabresse, Chile; Dr. Pedro Claudio Miranda Cabezas, Chile; Dr. Lucia Ponce, Chile; Dr. Marta Ofelia Aliste Silva, Chile; Dr. Ana Maria Flores, Chile; Dr. Edgardo David Tobias (Previous PI), Colombia; Dr. Patricia Julieta Velez-Sanchez, Colombia; Dr. Juan Jose Jaller Raad, Colombia; Dr. William Jose Otero Escalante, Colombia; Dr. Raul Alpizar, Costa Rica; Dr. Rene Alvarez-Mata, Costa Rica; Dr. Jose F. Diaz-Coto, Costa Rica; Dr. Patricia Alvarez-Felix, Dominican Republic; Dr. Diego Cesar-Ricardo Ramos-Remus, Mexico; Dr. Jorge Antonio Esquivel-Valerio, Mexico; Dr. Isaura Maria Rodriguez-Torres, Mexico; Dr. Hilario Ernesto Avila-Armengol, Mexico; Dr. Manuel Oswaldo Castaneda Jimenez, Peru; Dr.

Felix J. Romero, Peru; Dr. Risto Perich, Peru; Dr. Ariel Reynaldo Salinas, Peru; Dr. Roberto Leon Perez, Puerto Rico.

*Europe:* Dr. Filip Eduard Jeanne Van den Bosch, Belgium; Dr. Ivan Goranov, Bulgaria; Dr. Daniela Bichovska, Bulgaria; Rumen M. Stoilov, Bulgaria; Svetla Kopcheva, Bulgaria; Nadezhda G. Yordanova, Bulgaria; Dr. Boycho Oparanov, Bulgaria; Dr. Petr Bradna, Czech Republic; Dr. Zuzana Stejfova, Czech Republic; Dr. Zdenka Mosterova, Czech Republic; Prof. Jiri Vencovsky, Czech Republic; Dr. Miroslava Rosypalova, Czech Republic; Dr. Zdenek Fojtik, Czech Republic; Dr. med Rieke Alten, Germany; Prof. Dr. med Juergen Wollenhaupt, Germany; Prof. Dr. med Hubert Nuesslein, Germany; Dr. Siegfried Wassenberg, Germany; Dr. med Juergen Rech, Germany; Dr. med Sylke Wagner, Germany; Dr. med Reiner Kurthen, Germany; Dr. Ulrich Schoo, Germany; Dr. Istvan Szombati, Hungary; Dr. Attila Kovacs (Previous PI), Hungary; Dr. Laszlo Samson, Hungary; Dr. Sandor Nazon, Hungary; Dr. Eva Peterfai (Previous PI), Hungary; Dr. Gabriella Sulyok, Hungary; Dr. Regina Cseuz, Hungary; Dr. Maria Rell-Bakalarska, Poland; Dr. Anna Dudek, Poland; Dr. Barbara Grabowicz-Wasko, Poland; Dr. Joanna Glogowska-Szelag, Poland; Dr. Pavol Polak, Slovakia; Dr. Peter Belica, Slovakia; Dr. Ivan Ujvari, Slovakia; Dr. Agnesa Szolnokiova, Slovakia; Dr. Jozef Lukac, Slovakia; Dr. Juan Garcia Meijide, Spain; Dr. Federico Navarro Sarabia, Spain; Dr. Antonio Fernandez Nebro, Spain; Carlos Manuel Gonzalez-Fernandez, Spain; Eduardo Ucar Angulo, Jose Miguel Aranburu Albizuri (Previous PI), Spain; Ann Olofsson Sahlqvist, Sweden; John Svensson, Sweden; Elke Theander, Sweden; Dr. Halyna M. Hrytsenko, Ukraine; Andriy V. Petrov, Ukraine; Prof. Vladyslav V. Povoroznyuk, Ukraine; Prof. Mykola A. Stanislavchuk, Ukraine; Prof. Anatoliy S. Svintsitsky, Ukraine; Dr. Sergiy M. Kolomiyets, Ukraine.

*Rest of World:* Dr. Stephen Hall, Australia; A/Prof Peter T. Nash, Australia; Dr. Maureen Rischmueller, Australia; Dr. Rafat Faraawi, Canada; Dr. Jude F. Rodrigues, Canada; Dr. Alfred Augusto Cividino, Canada; Dr. Robert J. McKendry, Canada; Dr. Henry Niall Jones, Canada; Dr. Anna Maria Jaroszynska, Canada; Dr. Saeed Raza Shaikh, Canada; Dr. William G. Bensen, Canada; Dr. Arvind K. Chopra, India; Dr. Jugal Kishore Kadel, India; Dr. Sarath Chandra Mouli Veeravalli, India; Dr. Reena Sharma, India; Dr. Manoj Kumar Honnakere Venkataiya, India; Dr. Sapan Pandya, India; Dr. Shrikant Wagh; Eun Bong Lee, Republic of Korea; Bin Yoo, Republic of Korea; Yong-Beom Park, Republic of Korea; Dr. Suk Chyn Gun, Malaysia; Dr. Sook Khuan Chow, Malaysia; Dr. Cheng Lay The, Malaysia; Assoc Prof. Peter J. Gow, New Zealand; Dr. Gagrath (Joe) Pradeep Singh, New Zealand; Dr. Nigel Leslie Gilchrist, New Zealand; Dr. Alan Doube, New Zealand; Dr. Daniel Wai Tho Ching, New Zealand; A/Prof. William John Taylor, New Zealand; Dr. Edgar B. Ramiterre, Philippines; Dr. Perry Pua Tan, Philippines; Dr. Olga U. Stetsiouk, Russian Federation; Dr. Galina Usova, Russian Federation; Dr. Elena N. Ushakova, Russian Federation; Valeria Esip, Russian Federation; Andrey M. Sarana, Russian Federation; Alexey L. Maslyanskiy, Russian Federation; Dr. Andrey E. Dorokhov, Russian Federation; Dr. Larisa Eliseeva, Russian Federation; Dr. Tatiana A. Raskina, Russian Federation; Dr. Elena Vladimirovna Zonova, Russian Federation; Dr. Nadezhda Vladimirovna Izmozherova, Russian Federation; Olga Mikhailovna Lesnyak, Russian Federation; Dr. Wen-Chan Tsai, Taiwan; Dr. Der-Yuan Chen, Taiwan; Dr. Joung-liang Lan (Previous PI), Taiwan; Dr. Ming-Fei Liu, Taiwan; Dr. Wanruchada Katchamart, Thailand; Dr. Pajit Asavatanabodee, Thailand; Dr. Tasanee Kitumnuaypong, Thailand.
